# Supplementary material for: Therapeutic Effects of Zymomonas mobilis on Experimental DSS-Induced Colitis Mouse Model
Source: MDPI journal article supplement (doi:10.3390/microorganisms11112793), 2023-11-17
Supplement: s1 [file s1]

## Microorganisms

### Therapeutic effects of *Zymomonas mobilis* in experimental DSS-induced colitis mouse model

Manuela Maragno do Almo <sup>1,2</sup>, Isabel Garcia Sousa <sup>1</sup>, Vitor Guimarães Olinto <sup>1,3</sup>, Sylvia Barbosa Pinhate <sup>1,3</sup>, José Luiz de Paula Rôlo Jivago,<sup>4</sup> Davi Emanuel Ribeiro de Sousa <sup>5</sup>, Márcio Botelho de Castro <sup>5</sup>, Marciano Régis Rubini <sup>6</sup>, Andrea Queiroz Maranhão <sup>1,7</sup> and Marcelo de Macedo Brígido <sup>1,7</sup> \*

\* Correspondence: brigido@unb.br

<sup>1</sup> University of Brasilia, Institute of Biological Sciences, Department of Cell Biology, Brasilia, Brazil

<sup>2</sup> University of Brasilia, Medicine Faculty, Molecular Pathology Graduation Program, Brasilia, Brazil

<sup>3</sup> University of Brasilia, Institute of Biological Sciences, Molecular Biology Graduation Program, Brasilia, Brazil

<sup>4</sup> University of Brasilia, Institute of Biological Sciences, Brasilia, Brazil

<sup>5</sup> Veterinary Pathology Laboratory, Campus Darcy Ribeiro, University of Brasília, Brasília, Brazil.

<sup>6</sup> Embrapa Agroenergy, Laboratory of Genetics and Molecular Biology, Brasilia, Brazil

<sup>7</sup> Institute for Immunology Investigation, National Institute of Science and Technology (iii-INCT), Brazil

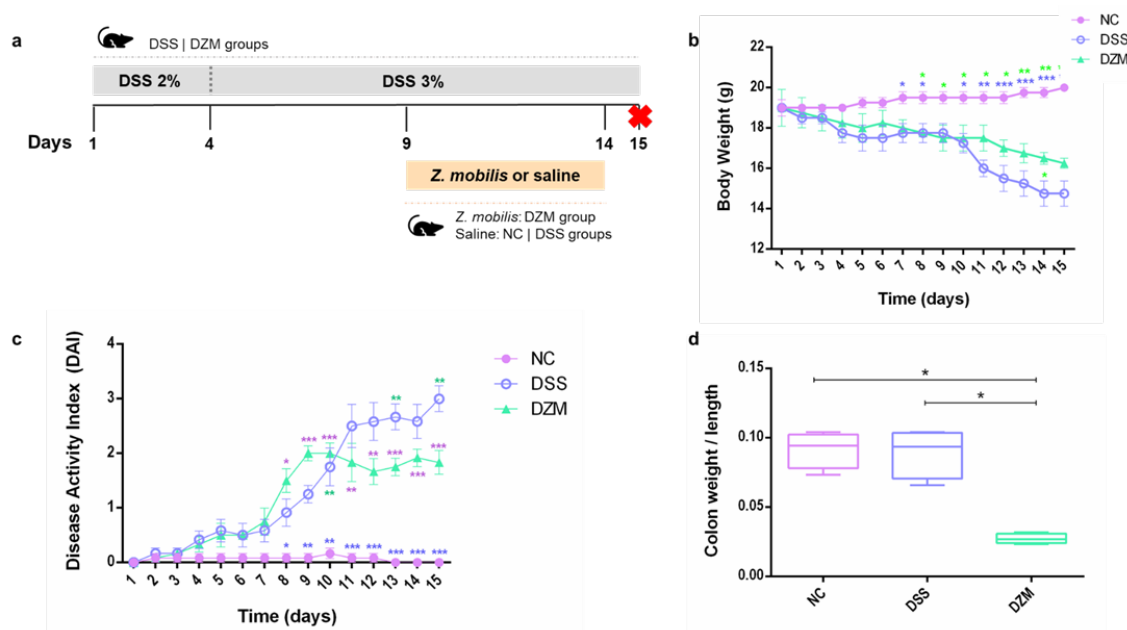

**Figure S1.** Pilot experimental analysis of oral administration of *Z. mobilis* and its effects in DSS induced colitis in mice. **a.** Animal experimental design: groups of four female C57BL/6 mice were used. Those from DSS and DZM groups ingested filtered water containing 2% DSS in the first 4 days for colitis induction, followed by 3% until the end of experiment. Throughout the experiment, the animals from DZM group were gavaged with *Z. mobilis*, while the NC and DSS groups, were gavaged with saline. On day 15 all animals were euthanized (represented by the red X). **b.** Average weight (g) of the animals was measured

during the fifteen days of experiment. Data are shown as the mean  $\pm$  SEM and each asterisk color represents the group for which there was a significant statistical difference. Statistical analysis was performed using one-way ANOVA with Tukey test, \*  $p < 0.05$  and \*\*  $p < 0.01$ . **c.** Disease Activity Index (DAI) calculated over the entire period of the experiment. Data are shown as the mean  $\pm$  SEM, and each asterisk color represents the group for which there was a significant statistical difference. Statistical analysis was performed using one-way ANOVA with the Tukey test, \*  $p < 0.05$  and \*\*  $p < 0.01$ . **d.** Colon weight/length ratio (cm) after euthanasia. Data are shown as the median and *SD*. Statistical analysis was performed using Mann-Whitney test, \*  $p < 0.05$  and \*\*  $p < 0.01$ .

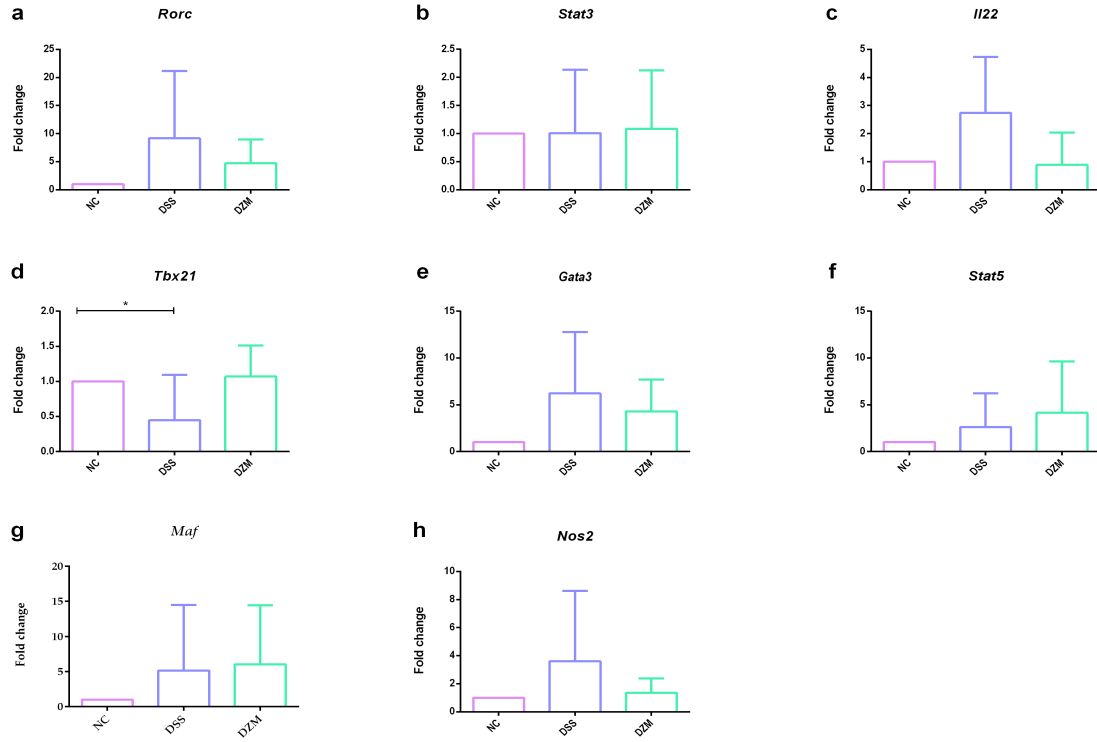

**Figure S2.** Colonic mRNA expression by real time PCR analysis. Relative gene expression: **a.** *Rorc*; **b.** *Stat3*; **c.** *Il22*; **d.** *Tbx21*; **e.** *Gata3*; **f.** *Stat5*; **g.** *Maf*; **h.** *Nos2*. Data are shown as the mean and *SD*.

**Table S1.** Primers used for real time qPCR analysis.

| Target       | Sequence                                                   |
|--------------|------------------------------------------------------------|
| <i>B2m</i>   | F: TGCTATCCAGAAAACCCCTCA<br>R: TTTCAATGTGAGGCGGGTGG        |
| <i>Foxp3</i> | F: ACTCGCATGTTCCGCTACTT<br>R: AGGGATTGGAGCACTTGTG          |
| <i>Tgfb</i>  | F: CTGACGTCACTGGAGTTGTACGG<br>R: GGTTCATGTCATGGATGGTGC     |
| <i>Il10</i>  | F: GGTTGCCAAGCCTTATCGGA<br>R: GAGAAATCGATGACAGCGCC         |
| <i>Ifny</i>  | F: AAGTTTGAGGTCAACAACCCAC<br>R: AATCTCTTCCCCACCCGAA        |
| <i>Il5</i>   | F: CTCTGTTGACAAGCAATGAGACG<br>R: TCTTCAGTATGTCTAGCCCCCTG   |
| <i>Stat6</i> | F: GGATTCAAGATTGGAAGCGGC<br>R: AATTTCCACCAGGCTTTCACAC      |
| <i>Tnfa</i>  | F: GTAGCCACGTCGTAGCAAA<br>R: ACAAGGTACAACCCATCGGC          |
| <i>Il6</i>   | F: GCCTTCTTGGGACTGATGCT<br>R: TGCCATTGCACAACCTCTTTCT       |
| <i>Il17</i>  | F: TTAACTCCCTTGGCGCAAAA<br>R: CTTTCCCTCCGCATTGACAC         |
| <i>Rorc</i>  | F: TGCAAGACTCATCGACAAGG<br>R: AGGGGATTCAACATCAGTGC         |
| <i>Il1β</i>  | F: TGCCACCTTTTGACAGTGATG<br>R: TGTGCTGCTGCGAGATTGA         |
| <i>Il22</i>  | F: GCTCAGCTCCTGTCACATCA<br>R: CAGTTCCCCAATCGCCTTGA         |
| <i>Stat3</i> | F: CTGCCCCGTACCTGAAGAC<br>R: AACGTGAGCGACTCAAACCTG         |
| <i>Gata3</i> | F: TTTACCCTCCGGCTTCATCCTCCT<br>R: TGCACCTGATACTTGAGGCACTCT |
| <i>Stat5</i> | F: CACTCCTGTAATTGGTTCTGTCA<br>R: CCAGGTCAAACCTCGCCATCT     |
| <i>Tbx21</i> | F: TCAGGACTAGGCGAAGGAGA<br>R: GCCTTCGGTTTCCTTATCAA         |
| <i>Nos2</i>  | F: GGTGAAGGGACTGAGCTGTT<br>R: ACGTTCTCCGTTCTCTTGACG        |
| <i>Maf</i>   | F: GGATGGCTTCAGAACTGGCA<br>R: AACATATTCCATGGCCAGGG         |
| <i>Muc3</i>  | F: CGTGGTCAACTGCGAGAATGG<br>R: CGGCTCTATCTCTACGCTCTC       |
| <i>Ocln</i>  | F: ATGACATGTATGGCGGAGAG<br>R: ATAGCCTCTGTCCAAGCAA          |
